# Supplementary material for: Transitioning Wintering Shorebirds to Agroecosystem: A Thorough Evaluation of Habitat Selection and Conservation Concern
Source: MDPI journal article supplement (doi:10.3390/d16010023), 2023-12-29
Supplement: s1 [file s1]

### Supplementary Table and Figure:

| SI No. | Species                | Habitat Specialization                                       | Foraging Guild                                   |
|--------|------------------------|--------------------------------------------------------------|--------------------------------------------------|
| 1      | Greater Sand Plover    | Intertidal mudflat/sand beach                                | Visual surface forager                           |
| 2      | Lesser Sand Plover     | Intertidal mudflat/sand beach                                | Visual surface forager                           |
| 3      | Kentish Plover         | Intertidal mudflat/sand beach                                | Visual surface forager                           |
| 4      | Little Ringed Plover   | Salt pans/agroecosystem                                      | Visual surface forager                           |
| 5      | Common Ringed Plover   | Salt pans/agroecosystem                                      | Visual surface forager                           |
| 6      | Pacific Golden Plover  | Intertidal mangroves/ mudflats                               | Visual surface forager                           |
| 7      | Grey Plover            | Intertidal mangroves/ mudflats                               | Visual surface forager                           |
| 8      | Caspian Plover         | Intertidal mudflat/sand beach                                | Visual surface forager                           |
| 9      | Hanuman Plover         | Intertidal mudflat/sand beach                                | Visual surface forager                           |
| 10     | Grey headed Lapwing    | Agroecosystems                                               | Visual surface forager                           |
| 11     | Red-wattled Lapwing    | Agroecosystems                                               | Visual surface forager                           |
| 12     | Yellow-wattled Lapwing | Agroecosystems                                               | Visual surface forager                           |
| 13     | Northern Lapwing       | Agroecosystems                                               | Visual surface forager                           |
| 14     | River Lapwing          | Agroecosystems                                               | Visual surface forager                           |
| 15     | White-tailed Lapwing   | Agroecosystems                                               | Visual surface forager                           |
| 16     | Black-winged Stilt     | Intertidal mudflats/ agroecosystems                          | Water surface foraging                           |
| 17     | Pied Avocet            | Intertidal mudflats/ agroecosystems                          | Water surface forager                            |
| 18     | Common Sandpiper       | Intertidal mudflats/ sand beaches                            | Visual & tactile surface forager                 |
| 19     | Wood Sandpiper         | Intertidal mangroves/ agroecosystems                         | Visual surface forager & & water surface forager |
| 20     | Marsh Sandpiper        | Intertidal mangroves/ agroecosystems                         | Visual surface forager & & water surface forager |
| 21     | Green Sandpiper        | Intertidal mangroves/agroecosystems                          | Visual surface forager & & water surface forager |
| 22     | Curlew Sandpiper       | Intertidal mudflats/ sand beaches                            | Tactile surface forager                          |
| 23     | Broad-billed Sandpiper | Intertidal mudflats/ sand beaches                            | Tactile surface forager                          |
| 24     | Terek Sandpiper        | Intertidal mudflats/ sand beaches                            | Tactile surface forager                          |
| 25     | Little Stint           | Intertidal mudflats/agroecosystems                           | Biofilm grazing                                  |
| 26     | Temminck's Stint       | Intertidal mudflats/agroecosystems                           | Biofilm grazing                                  |
| 27     | Long-toed Stint        | Intertidal mudflats/agroecosystems                           | Biofilm grazing                                  |
| 28     | Dunlin                 | Intertidal mudflats/ sand beaches                            | Tactile surface forager & biofilm grazer         |
| 29     | Sanderling             | Intertidal mudflats/ sand beaches                            | Tactile surface forager & biofilm grazer         |
| 30     | Common Redshank        | Intertidal mudflats/ mangroves/ sand beaches/ agroecosystems | Generalist forager                               |

|    |                       |                                                              |                                         |
|----|-----------------------|--------------------------------------------------------------|-----------------------------------------|
| 31 | Spotted Redshank      | Intertidal mudflats/ mangroves/ sand beaches/ agroecosystems | Generalist forager                      |
| 32 | Common Greenshank     | Intertidal mudflats/ mangroves/ sand beaches/ agroecosystems | Generalist forager                      |
| 33 | Nordmann's Greenshank | Intertidal mudflats/ mangroves/ sand beaches/ agroecosystems | Generalist forager                      |
| 34 | Common Snipe          | Intertidal mudflats/ agroecosystems                          | Generalist forager                      |
| 35 | Greater Painted Snipe | Intertidal mudflats/ agroecosystems                          | Generalist forager                      |
| 36 | Pin-tailed Snipe      | Intertidal mudflats/ agroecosystems                          | Generalist forager                      |
| 37 | Solitary Snipe        | Intertidal mudflats/ agroecosystems                          | Generalist forager                      |
| 38 | Swinhoe's Snipe       | Intertidal mudflats/ agroecosystems                          | Generalist forager                      |
| 39 | Jack Snipe            | Intertidal mudflats/ agroecosystems                          | Generalist forager                      |
| 40 | Eurasian Curlew       | Intertidal mudflats/ mangroves/ sand beaches                 | Generalist forager                      |
| 41 | Eastern curlew        | Intertidal mudflats/ mangroves/ sand beaches                 | Generalist forager                      |
| 42 | Black-tailed Godwit   | Intertidal mudflats/ mangroves/ sand beaches                 | Generalist forager                      |
| 43 | Bar-tailed Godwit     | Intertidal mudflats/ mangroves/ sand beaches                 | Generalist forager                      |
| 44 | Whimbrel              | Intertidal mudflats/ mangroves/ sand beaches.                | Generalist forager                      |
| 45 | Great Knot            | Intertidal mudflats/ sand beaches                            | Tactile surface feeder & biofilm grazer |
| 46 | Ruff                  | Intertidal mudflats/agroecosystems                           | Generalist forager                      |
| 47 | Collared Pratincole   | Intertidal mudflats/ upland/grasslands                       | Visual surface forager & aerial forager |
| 48 | Oriental Pratincole   | Intertidal mudflats/ upland/grasslands                       | Visual surface forager & aerial forager |
| 49 | Small Pratincole      | Intertidal mudflats/ upland/grasslands                       | Visual surface forager & aerial forager |
| 50 | Ruddy Turnstone       | Intertidal mudflats/ sand beaches/ rocky beaches             | Visual surface forager                  |
| 51 | Great Thick-knee      | Upland/grasslands                                            | Visual surface forager                  |
| 52 | Indian Stone Curlew   | Upland/grasslands                                            | Visual surface forager                  |
| 53 | Indian Courser        | Upland/grasslands                                            | Visual surface forager                  |

**Supplementary Table S1.** Classification of shorebirds according to habitat specialization and foraging guild [18,117].

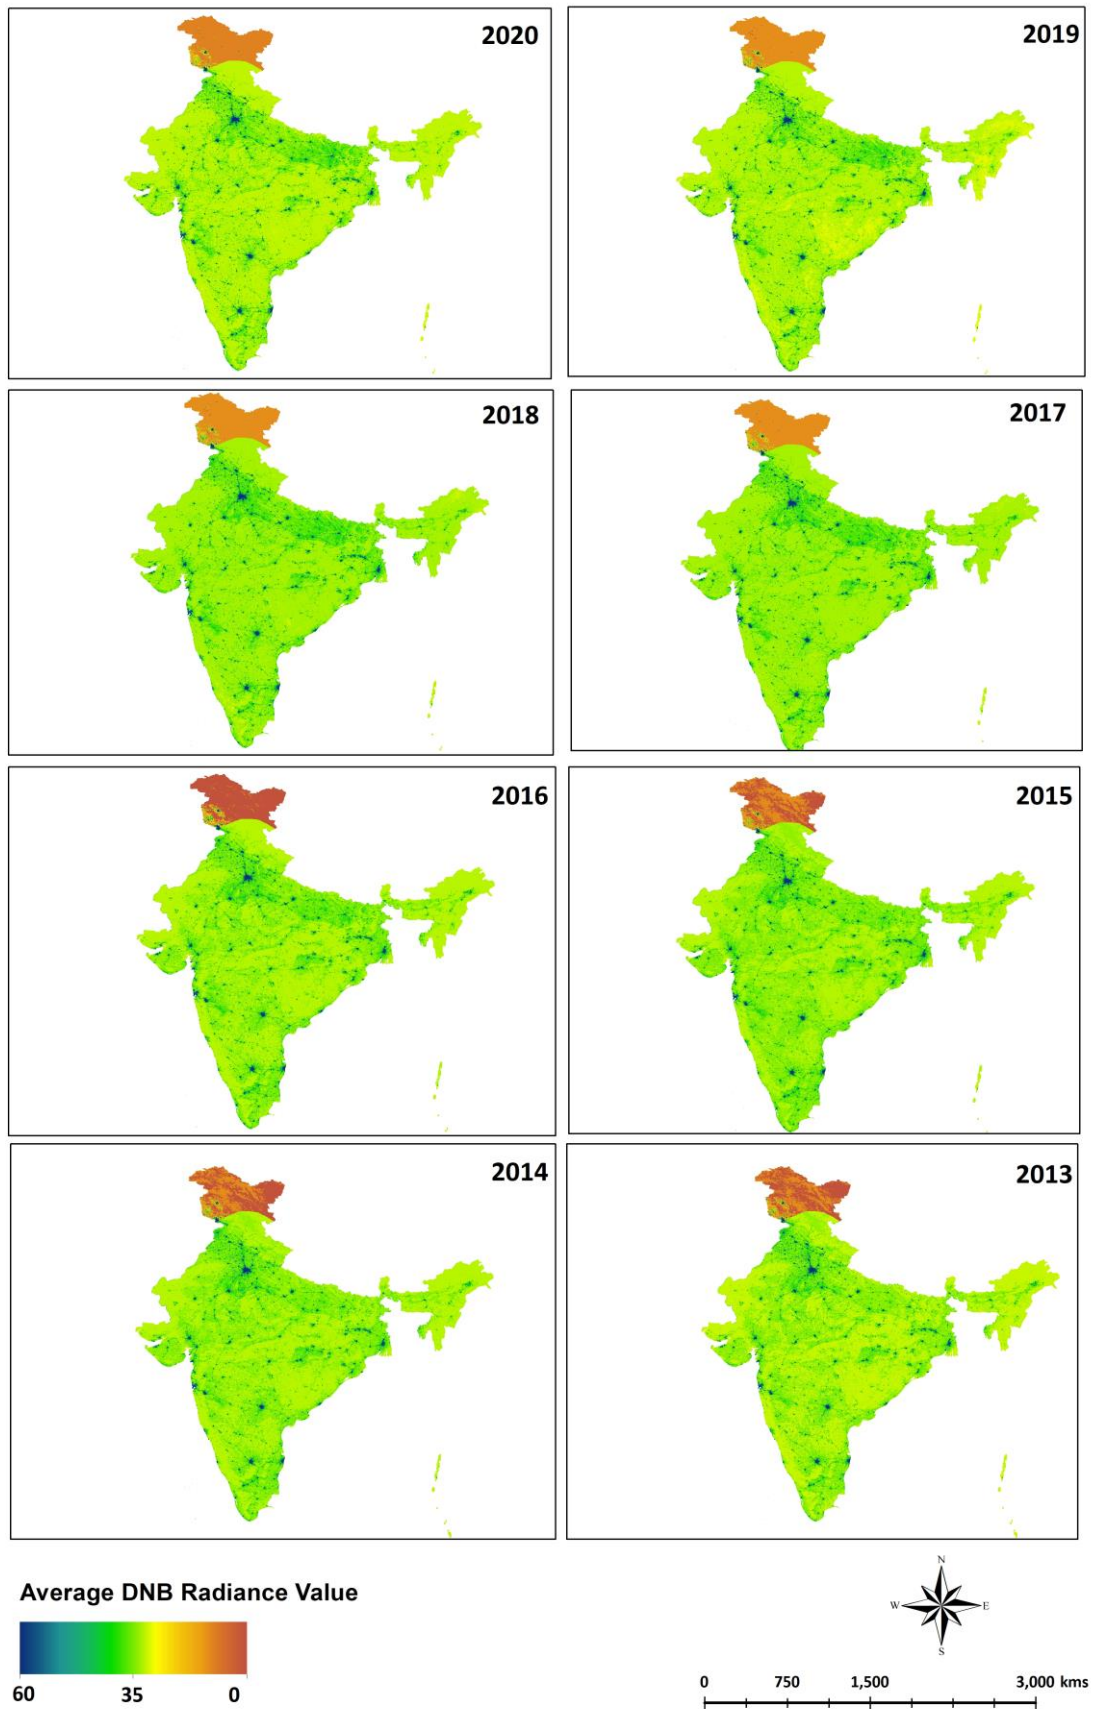

**Supplementary Figure S1:** Night time light data between 2013 and 2020 in Indian perspectives; showing that consumption light has been increasing year after year. The unit of the DNB radiance value is nanoWatts/sr/cm<sup>2</sup>
